# Supplementary material for: Essential role of the iron-sulfur cluster binding domain of the primase regulatory subunit Pri2 in DNA replication initiation
Source: PubMed Central journal article supplement (PMC4348247; doi:10.1007/s13238-015-0134-8), 2015-02-04
Supplement: 13238_2015_134_MOESM1_ESM.pdf [file 13238_2015_134_MOESM1_ESM.pdf]

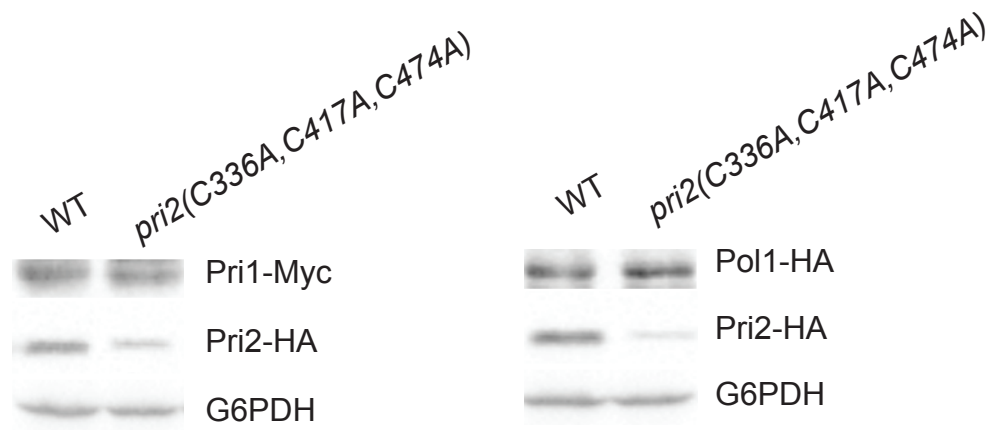

**Supplemental Figure S1. Protein levels of Pri1 and Pol1 protein remain unchanged in *pri2(C336A,C417A,C474A)* mutants.**

Protein extracts from log-phase cells were resolved by SDS-PAGE and probed for the epitope-tagged proteins and G6PDH as a loading control. (A) Both wild-type (WT) and *pri2(C336A,C417A,C474A)* contained PRI1-MYC and PRI2-HA at their respective chromosomal loci. (B) Both wild-type (WT) and *pri2(C336A,C417A,C474A)* contained POL1-HA (171 kD) and PRI2-HA (67 kD) at their respective chromosomal loci.
